# Supplementary material for: Microstructure and characterization of aluminum-incorporated calcium silicate hydrates (C–S–H) under hydrothermal conditions
Source: Royal Society of Chemistry journal article supplement (doi:10.1039/c8ra04423f), 2018-01-01
Supplement: c8ra04423f1.pdf [file c8ra04423f1.pdf]

## Supporting Information

### Microstructure and characterization of the aluminum-incorporated calcium silicate hydrates (C-S-H) under hydrothermal conditions

*Xiaoling Qu, Zhiguang Zhao\*, Xuguang Zhao*

School of Civil Engineering, Shaoguan University, Shaoguan 512005, PR China

\* Corresponding author. E-mail: [zhao\\_zhi\\_guang@126.com](mailto:zhao_zhi_guang@126.com)

Table S1 Solid phase compositions of the hydrothermally treated CaO-SiO<sub>2</sub>-H<sub>2</sub>O system with different aluminum additions determined by Rietveld refinement analyses.

| Reaction condition | Al/(Al+Si) | Tobermorite | Quartz     | Hydrogarnet | Amorphous phase | $R_{wp}$ (%) | $R_p$ (%) |
|--------------------|------------|-------------|------------|-------------|-----------------|--------------|-----------|
| 180 °C,<br>7 h     | 0          | 55.72±2.15  | -          | -           | 44.28±2.15      | 13.92        | 10.34     |
|                    | 0.01       | 55.59±2.45  | -          | -           | 44.41±2.45      | 12.23        | 9.34      |
|                    | 0.03       | 71.26±3.98  | -          | -           | 28.74±3.98      | 10.82        | 8.18      |
|                    | 0.06       | 62.64±2.32  | 5.27±0.29  | 1.21±0.25   | 30.88±2.86      | 11.70        | 9.00      |
|                    | 0.09       | 36.76±1.28  | 4.47±0.21  | 1.23±0.20   | 57.54±1.69      | 12.40        | 9.36      |
|                    | 0.12       | 19.65±1.09  | 9.76±0.56  | 2.17±0.40   | 68.42±2.05      | 9.13         | 6.70      |
| 180 °C,<br>5 h     | 0          | 37.08±0.15  | 3.47±1.12  | -           | 59.45±1.27      | 10.56        | 8.12      |
|                    | 0.01       | 39.31±0.14  | 3.54±1.10  | -           | 57.15±1.24      | 9.87         | 7.48      |
|                    | 0.03       | 64.60±1.75  | 1.29±0.14  | -           | 34.11±1.89      | 11.79        | 9.09      |
|                    | 0.06       | 43.02±1.26  | 2.78±0.14  | 0.51±0.17   | 53.69±1.57      | 11.74        | 8.96      |
|                    | 0.09       | 23.89±2.98  | 9.97±1.33  | 2.74±0.90   | 63.40±5.21      | 13.00        | 9.72      |
|                    | 0.12       | 12.80±0.16  | 10.22±0.10 | 8.01±0.11   | 68.97±0.37      | 12.55        | 9.25      |
| 160 °C,<br>7 h     | 0          | 27.19±2.32  | 2.93±0.13  | -           | 69.88±2.45      | 11.03        | 7.71      |
|                    | 0.01       | 27.31±2.56  | 2.88±0.11  | -           | 69.81±2.67      | 10.33        | 7.77      |
|                    | 0.03       | 29.69±0.84  | 5.21±0.21  | -           | 65.10±1.05      | 11.97        | 9.13      |
|                    | 0.06       | 25.30±1.23  | 10.22±0.55 | 1.64±0.39   | 62.84±2.17      | 11.82        | 8.88      |
|                    | 0.09       | 19.20±0.86  | 12.47±0.54 | 2.95±0.34   | 65.38±1.74      | 13.69        | 10.66     |
|                    | 0.12       | 12.54±0.44  | 12.58±0.19 | 7.43±0.26   | 67.45±0.89      | 10.79        | 8.35      |

Indexes:  $R_{wp}$  and  $R_p$  are the final value of the weighted profile  $R$  factors.
